# Supplementary material for: On the Reconstruction of the Center of a Projection by Distances and Incidence Relations
Source: Springer Nature journal article supplement (doi:10.1007/s10851-020-00999-w), 2020-12-18
Supplement: 10851_2020_999_MOESM2_ESM.pdf [file 10851_2020_999_MOESM2_ESM.pdf]

Auxiliary file to the paper titled

**On the reconstruction of the center of a projection by  
distances and incidence relations**

submitted to

*Journal of Mathematical Imaging and Vision*

by the authors

ANDRÁS PONGRÁCZ AND CSABA VINCZE.

András Pongrácz, corresponding author  
affiliation: Institute of Mathematics, University of Debrecen, P.O.Box  
400, H-4002 Debrecen, Hungary  
email: [pongracz.andras@science.unideb.hu](mailto:pongracz.andras@science.unideb.hu)

# unified\_irreducibility

Andras

12/6/2019

```
var('u, a, b, c, x, y, A, B, C, D, E, F')
(u, a, b, c, x, y, A, B, C, D, E, F)
```

```
d_4=(a^4 - 2*a^2*b^2 + b^4 - 2*a^2*c^2 - 2*b^2*c^2 + c^4)
d_3=4*(u*a^4 + (1-u)*a^2*b^2 - u*a^2*c^2 - b^4 + b^2*c^2)
d_2x=2*(3*u^2*a^4 + (-u^2 + 4*u - 1)*a^2*b^2 - u^2*a^2*c^2 + 3*b^4 - \
      b^2*c^2)
d_2y=2*(u^2*a^4 - (u^2+1)*a^2*b^2 - u^2*a^2*c^2 + b^4 - b^2*c^2)
d_1=4*(u^3*a^4 + (u^2-u)*a^2*b^2 - b^4)
d_0=(u^4*a^4 - 2*u^2*a^2*b^2 + b^4)
```

```
#####
#####
# Case (1)
#####
#####
```

```
var('u, a, b, c, x, y, A, C')
```

```
poly_fact_1=expand(
(x^2+2*i*x*y-y^2+ A*x + i*A*y +C)*(x^2-2*i*x*y-y^2+ A*x -i*A*y +C)
)
```

```
poly_fact_1.maxima_methods().collectterms(x, y)
```

```
(u, a, b, c, x, y, A, C)
```

```
2*A*x^3 + x^4 + 2*A*x*y^2 + 2*x^2*y^2 + y^4 + 2*A*C*x + (A^2 + 2*C)*x^2 + (A^2 -
2*C)*y^2
+ C^2
```

```
# Clearly 2*(d_2x + d_2y)*d_0 - d_1^2 = 0.
```

---

```

# We verify that the left hand side is  $-8*(u^2*a^2-b^2)^2*((u^2*a^2+b^2)*c^2+(u+1)^2*a^2*b^2)$ , which is zero iff  $b=u*a$ .
# However, that is impossible: in that case,  $C=0$ , and then  $d_{2x}-d_{2y}=0$ , a contradiction.

```

```

expr_1=expand(
(2*(d_2x + d_2y)*d_0 - d_1^2) +
8*(u^2*a^2-b^2)^2*((u^2*a^2+b^2)*c^2+(u+1)^2*a^2*b^2)
)

```

```

expr_1.maxima_methods().collectterms(a,b)
0

```

```

#####
#####
# Case (2)
#####
#####

```

```

var('u,a,b,c,x,y,A,C,D,F')

```

```

poly_fact_2=expand(
(x^2+y^2+ A*x + C)*(x^2+y^2+ D*x + F)
)

```

```

poly_fact_2.maxima_methods().collectterms(x,y)

```

```

(u, a, b, c, x, y, A, C, D, F)
(A + D)*x^3 + x^4 + (A + D)*x*y^2 + 2*x^2*y^2 + y^4 + (A*D + C + F)*x^2 + (C + F)*y^2 +
C*F + (C*D + A*F)*x

```

```

# From two quadratic equations, we obtain the following necessary \
condition (see the paper):

```

```

#  $d_1^2*d_4-d_1*d_3*d_2y+(d_{2x}-d_{2y})*d_{2y}^2+d_0*d_3^2-4*d_0*(d_{2x}-d_{2y})*d_4$ .

```

```

# We verify that the left hand side is  $64*(u^4+2*u^3+u^2)*a^4*b^4*c^4$ , which is negative, a contradiction.

```

```

expr_2=expand(
(d_1^2*d_4-d_1*d_3*d_2y+(d_2x-d_2y)*d_2y^2+d_0*d_3^2-4*d_0*(d_2x-d_2y)*d_4) -
64*(u^4+2*u^3+u^2)*a^4*b^4*c^4
)

```

```

expr_2.maxima_methods().collectterms(a,b)
0

```

```

#####
#####
# Case (3)
#####
#####

var('u, a, b, c, x, y, A, B, C')

poly_fact_3=expand(
(x^2+y^2+ A*x + B*y + C)*(x^2+y^2+ A*x - B*y + C)
)

poly_fact_3.maxima_methods().collectterms(x, y)
(u, a, b, c, x, y, A, B, C)
2*A*x^3 + x^4 + 2*A*x*y^2 + 2*x^2*y^2 + y^4 + 2*A*C*x + (A^2 + 2*C)*x^2 - (B^2 -
2*C)*y^2
+ C^2

# Clearly , d_1^2*d_4 - d_3^2*d_0 = 0.
# We verify that the above expression is 64*a^2*b^2*c^2*(u^2*a^2 - b\
^2)^2*(u*c^2-((u^2+u)*a^2 + (u+1)*b^2)).
# Thus b=u*a, or c^2=(u+1)*(a^2 + (1/u)*b^2).

expr_3_1=expand(
(d_1^2*d_4 - d_3^2*d_0) -
64*a^2*b^2*c^2*(u^2*a^2 - b^2)^2*(u*c^2-((u^2+u)*a^2 + (u+1)*b^2))
)
expr_3_1.maxima_methods().collectterms(a, b, c)
0

# Our next goal is to conclude b=u*a from the other possibility c\
^2=(u+1)*(a^2 + (1/u)*b^2) as well.
# We have (4*d_2x*d_4 - d_3^2)^2 - 64*d_0*d_4^3 = 0.
# The left hand side is computed below.

expr_3_2=expand(
((4*d_2x*d_4 - d_3^2)^2 - 64*d_0*d_4^3)
)
(expr_3_2).maxima_methods().collectterms(c)
256*a^2*b^2*c^12*u^2 + 256*(a^4*b^2*u^4 - 4*a^4*b^2*u^3 - 5*a^4*b^2*u^2 - 5*a^2*b^4*u^2 -
4*a^2*b^4*u + a^2*b^4)*c^10 - 512*(2*a^4*b^4*u^4 - 8*a^6*b^2*u^3 - 4*a^4*b^4*u^3 -
5*a^6*b^2*u^2 - 18*a^4*b^4*u^2 - 5*a^2*b^6*u^2 - 4*a^4*b^4*u - 8*a^2*b^6*u +
2*a^4*b^4)*c^8 - 512*(3*a^8*b^2*u^4 - 3*a^4*b^6*u^4 + 12*a^8*b^2*u^3 + 20*a^6*b^4*u^3 +
5*a^8*b^2*u^2 + 27*a^6*b^4*u^2 + 27*a^4*b^6*u^2 + 5*a^2*b^8*u^2 + 20*a^4*b^6*u +

```

$$\begin{aligned}
& 12*a^2*b^8*u - 3*a^6*b^4 + 3*a^2*b^8)*c^6 + 256*(8*a^10*b^2*u^4 + 12*a^8*b^4*u^4 - \\
& 4*a^4*b^8*u^4 + 16*a^10*b^2*u^3 + 24*a^8*b^4*u^3 + 32*a^6*b^6*u^3 - 8*a^4*b^8*u^3 + \\
& 5*a^10*b^2*u^2 + 20*a^8*b^4*u^2 + 46*a^6*b^6*u^2 + 20*a^4*b^8*u^2 + 5*a^2*b^10*u^2 - \\
& 8*a^8*b^4*u + 32*a^6*b^6*u + 24*a^4*b^8*u + 16*a^2*b^10*u - 4*a^8*b^4 + 12*a^4*b^8 + \\
& 8*a^2*b^10)*c^4 - 256*(3*a^12*b^2*u^4 - 8*a^10*b^4*u^4 + 6*a^8*b^6*u^4 - a^4*b^10*u^4 + \\
& 4*a^12*b^2*u^3 - 8*a^10*b^4*u^3 + 8*a^6*b^8*u^3 - 4*a^4*b^10*u^3 + a^12*b^2*u^2 - \\
& 3*a^10*b^4*u^2 + 2*a^8*b^6*u^2 + 2*a^6*b^8*u^2 - 3*a^4*b^10*u^2 + a^2*b^12*u^2 - \\
& 4*a^10*b^4*u + 8*a^8*b^6*u - 8*a^4*b^10*u + 4*a^2*b^12*u - a^10*b^4 + 6*a^6*b^8 - \\
& 8*a^4*b^10 + 3*a^2*b^12)*c^2
\end{aligned}$$

# Now we replace  $c^2$  in `expr_3_2` by  $(u+1)*(a^2 + (1/u)*b^2) \setminus$  everywhere, and verify that the expression obtained is  $256*a^2*b^2*((u+1)*(a^2 + (1/u)*b^2))^*(u^2*a^2-b^2)^4*((1 + 1/u)*a^2 + (1/u^3 + 1/u^4)*b^2)$ . Hence,  $b=u*a$  indeed.

```

expr_3_3=expand(
(256*a^2*b^2*((u+1)*(a^2 + (1/u)*b^2))^6*u^2 +
256*(a^4*b^2*u^4 - 4*a^4*b^2*u^3 - 5*a^4*b^2*u^2 - 5*a^2*b^4*u^2 - \
4*a^2*b^4*u + a^2*b^4)*((u+1)*(a^2 + (1/u)*b^2))^5 -
512*(2*a^4*b^4*u^4 - 8*a^6*b^2*u^3 - 4*a^4*b^4*u^3 - 5*a^6*b^2*u^2 - \
18*a^4*b^4*u^2 - 5*a^2*b^6*u^2 - 4*a^4*b^4*u - 8*a^2*b^6*u + 2*a^4*b^4)*((u+1)*(a^2 + (1/u)*b^2))^4 -
512*(3*a^8*b^2*u^4 - 3*a^4*b^6*u^4 + 12*a^8*b^2*u^3 + 20*a^6*b^4*u^3 \
+ 5*a^8*b^2*u^2 + 27*a^6*b^4*u^2 + 27*a^4*b^6*u^2 + 5*a^2*b^8*u^2 + 20*a^4*b^6*u + 12*a^2*b^8*u - 3*a^6*b^4 + 3*a^2*b^8)*((u+1)\
*(a^2 + (1/u)*b^2))^3 +
256*(8*a^10*b^2*u^4 + 12*a^8*b^4*u^4 - 4*a^4*b^8*u^4 + 16*a^10*b^2*u^3 + 24*a^8*b^4*u^3 + 32*a^6*b^6*u^3 - 8*a^4*b^8*u^3 + 5*a^10*b^2*u^2 + 20*a^8*b^4*u^2 + 46*a^6*b^6*u^2 + 20*a^4*b^8*u^2 + 5*a^10*b^2*u^2 - 8*a^8*b^4*u + 32*a^6*b^6*u + 24*a^4*b^8*u + 16*a^2*b^10*u - 4*a^8*b^4 + 12*a^4*b^8 + 8*a^2*b^10)*((u+1)*(a^2 + (1/u)*b^2))^2 -
256*(3*a^12*b^2*u^4 - 8*a^10*b^4*u^4 + 6*a^8*b^6*u^4 - a^4*b^10*u^4 \
+ 4*a^12*b^2*u^3 - 8*a^10*b^4*u^3 + 8*a^6*b^8*u^3 - 4*a^4*b^10*u^3 + a^12*b^2*u^2 - 3*a^10*b^4*u^2 + 2*a^8*b^6*u^2 + 2*a^6*b^8*u^2 - 3*a^4*b^10*u^2 + a^2*b^12*u^2 - 4*a^10*b^4*u + 8*a^8*b^6*u - \
8*a^4*b^10*u + 4*a^2*b^12*u - a^10*b^4 + 6*a^6*b^8 - 8*a^4*b^10 \
+ 3*a^2*b^12)*((u+1)*(a^2 + (1/u)*b^2))) -
256*a^2*b^2*((u+1)*(a^2 + (1/u)*b^2))*(u^2*a^2-b^2)^4*((1 + 1/u)*a^2 \
+ (1/u^3 + 1/u^4)*b^2)
)
(expr_3_3).maxima_methods().collectterms(a,b)
0

```

```

# Thus d_0=0, and consequently, C=0, which implies d_3^2-4*d_2x*d_4\
=0. See the computation of the left hand side below.

expr_3_4=expand(
(d_3^2-4*d_2x*d_4)
)
(expr_3_4).maxima_methods().collectterms(a,c)
-8*a^8*u^2 + 24*a^6*c^2*u^2 - 24*a^4*c^4*u^2 + 8*a^2*c^6*u^2 - 8*b^8 + 24*b^6*c^2 -
24*b^4*c^4 + 8*b^2*c^6 + 8*(3*b^2*u^2 + b^2)*a^6 + 8*(6*b^2*u^2 + 8*b^2*u - b^2)*a^4*c^2 -
8*(b^2*u^2 + 8*b^2*u + b^2)*a^2*c^4 - 24*(b^4*u^2 + b^4)*a^4 - 8*(b^4*u^2 - 8*b^4*u -
6*b^4)*a^2*c^2 + 8*(b^6*u^2 + 3*b^6)*a^2

```

```

# We verify that if b=u*a, then the left hand side is 16*u^2*a^2*c\
^2*(c^2-(u+1)^2*a^2)^2. Thus c=(u+1)*a, and in particular c=a+b, \
a contradiction.

```

```

b=u*a

expr_3_5=expand(
(-8*a^8*u^2 + 24*a^6*c^2*u^2 - 24*a^4*c^4*u^2 + 8*a^2*c^6*u^2 - 8*b\
^8 + 24*b^6*c^2 - 24*b^4*c^4 + 8*b^2*c^6 + 8*(3*b^2*u^2 + b^2)*a\
^6 + 8*(6*b^2*u^2 + 8*b^2*u - b^2)*a^4*c^2 - 8*(b^2*u^2 + 8*b^2*u\
+ b^2)*a^2*c^4 - 24*(b^4*u^2 + b^4)*a^4 - 8*(b^4*u^2 - 8*b^4*u - \
6*b^4)*a^2*c^2 + 8*(b^6*u^2 + 3*b^6)*a^2) -
16*u^2*a^2*c^2*(c^2-(u+1)^2*a^2)^2
)
(expr_3_5).maxima_methods().collectterms(a,c)
0

```

```

#####
#####
# Case (4)
#####
#####

var('u,a,b,c,x,y,A,C,D')

poly_fact_4=expand(
(x^3 - i*x^2*y + x*y^2 - i*y^3 + A*x^2 + i*(C-A)*x*y + C*y^2 + D*x + \
i*(A*C-C^2-D)*y + C*(C^2-A*C+D))*(x + i*y + C)
)

poly_fact_4.maxima_methods().collectterms(x,y)
(u, a, b, c, x, y, A, C, D)
-A*C^3 + C^4 + (A + C)*x^3 + x^4 + (A + C)*x*y^2 + 2*x^2*y^2 + y^4 + C^2*D + (A*C + D)*x^2

```

$$-(A^*C - 2^*C^2 - D)^*y^2 - (A^*C^2 - C^3 - 2^*C^*D)^*x$$

#(2\*A\*C - 2\*C^2)\*C^2 - 2\*(A\*C^2 - C^3 - 2\*C\*D)\*C + 4\*(-A\*C^3 + C^4 + \ C^2\*D)=0, so C is a root of the quadratic polynomial (d\_2x-d\_2y)\ \*z^2 - 2\*d\_1\*z+4\*d\_0 (after multiplication by d\_4). The \ discriminant of this polynomial is zero, shown by the following \ caculation. (The leading coefficient is not zero, thus the \ polynomial is really quadratic.)

```
expr_4_1=expand(
4*d_1^2-4*(d_2x-d_2y)*4*d_0
)
expr_4_1.maxima_methods().collectterms(a,b,c)
0
```

# Hence,  $C = d_1/(d_{2,x}-d_{2,y})$ . We find another quadratic \ equation for C, and substitute this in it.  
# That other equation is obtained by  $A = d_3/d_4 - C$  and  $2^*C(A-C) = (d_2x - d_2y)/d_4$ . Hence, we have  $4^*C^2 - 2^*d_3/d_4^*C + (d_2x-d_2y)/d_4 = 0$ , that is,  $4^*d_4^*C^2 - 2^*d_3^*C + (d_2x-d_2y) = 0$ . Putting  $C = d_1/(d_2x-d_2y)$  yields  $4^*d_4^*d_1^2 - 2^*d_3^*d_1^*(d_2x-d_2y) + (d_2x-d_2y)^3 = 0$ . See the left hand side below.

```
expr_4_2=expand(
4*d_4*d_1^2 - 2*d_3*d_1*(d_2x-d_2y) + (d_2x-d_2y)^3
)
expr_4_2.maxima_methods().collectterms(c)
64*a^8*b^4*u^6 + 256*a^8*b^4*u^5 + 128*a^6*b^6*u^5 + 384*a^8*b^4*u^4 + 512*a^6*b^6*u^4 +
64*a^4*b^8*u^4 + 256*a^8*b^4*u^3 + 768*a^6*b^6*u^3 + 256*a^4*b^8*u^3 + 64*a^8*b^4*u^2 +
512*a^6*b^6*u^2 + 384*a^4*b^8*u^2 + 128*a^6*b^6*u + 256*a^4*b^8*u + 64*a^4*b^8 +
64*(a^8*u^6 + 2*a^6*b^2*u^5 - 2*a^6*b^2*u^4 + a^4*b^4*u^4 - 4*a^4*b^4*u^3 + a^4*b^4*u^2 -
2*a^2*b^6*u^2 + 2*a^2*b^6*u + b^8)*c^4 - 128*(a^8*b^2*u^6 + 2*a^6*b^4*u^5 - a^8*b^2*u^4 -
a^6*b^4*u^4 + a^4*b^6*u^4 - 2*a^6*b^4*u^3 - 2*a^4*b^6*u^3 + a^6*b^4*u^2 - a^4*b^6*u^2 -
a^2*b^8*u^2 + 2*a^4*b^6*u + a^2*b^8)*c^2
```

# The expression expr\_4\_2 is quadratic in  $c^2$ , hence its \ discriminant is non-negative. See the discriminant below.

```
expr_4_3=expand(
(128*(a^8*b^2*u^6 + 2*a^6*b^4*u^5 - a^8*b^2*u^4 - a^6*b^4*u^4 + a^4*\
b^6*u^4 - 2*a^6*b^4*u^3 - 2*a^4*b^6*u^3 + a^6*b^4*u^2 - a^4*b^6*u\
^2 - a^2*b^8*u^2 + 2*a^4*b^6*u + a^2*b^8))^2 -
```

```

4*64*(a^8*u^6 + 2*a^6*b^2*u^5 - 2*a^6*b^2*u^4 + a^4*b^4*u^4 - 4*a^4*b^4*u^3 + a^4*b^4*u^2 - 2*a^2*b^6*u^2 + 2*a^2*b^6*u + b^8)*(64*a^8*b^4*u^6 + 256*a^8*b^4*u^5 + 128*a^6*b^6*u^5 + 384*a^8*b^4*u^4 + 512*a^6*b^6*u^4 + 64*a^4*b^8*u^4 + 256*a^8*b^4*u^3 + 768*a^6*b^6*u^3 + 256*a^4*b^8*u^3 + 64*a^8*b^4*u^2 + 512*a^6*b^6*u^2 + 384*a^4*b^8*u^2 + 128*a^6*b^6*u + 256*a^4*b^8*u + 64*a^4*b^8)
)

```

```

expr_4_3.maxima_methods().collectterms(a,b)
-65536*(u^11 + 2*u^10 + u^9)*a^16*b^4 - 131072*(2*u^10 + 3*u^9 - u^7)*a^14*b^6 -
65536*(6*u^9 + 4*u^8 - 9*u^7 - 6*u^6 + u^5)*a^12*b^8 - 262144*(u^8 - u^7 - 4*u^6 - u^5 + u^4)*a^10*b^10 - 65536*(u^7 - 6*u^6 - 9*u^5 + 4*u^4 + 6*u^3)*a^8*b^12 + 131072*(u^5 - 3*u^3 - 2*u^2)*a^6*b^14 - 65536*(u^3 + 2*u^2 + u)*a^4*b^16

```

```

# See the verification below that expr_4_3 coincides with 65536*a^4*b^4*(b^2-u^2*a^2)^2*(-(u^3 + 2*u^2 + u)*b^8 + (-4*u^4-8*u^3-4*u^2)*a^2*b^6 + (-6*u^5-12*u^4-6*u^3)*a^4*b^4 + (-4*u^6-8*u^5-4*u^4)*a^6*b^2 + (-u^7-2*u^6-u^5)*a^8), which is clearly negative unless b=u*a.

```

```

# Hence, b=u*a, and then d_0=d_1=0. Note that C cannot be zero, as otherwise d_2x-d_2y=0. Thus A*C^2-C^3-CD=0, and then CD=0, which yields D=0. Then by d_0=0 we have A=C, and thus d_2x-d_2y=0, a contradiction.

```

```

expr_4_4=expand(
(-65536*(u^11 + 2*u^10 + u^9)*a^16*b^4 - 131072*(2*u^10 + 3*u^9 - u^7)*a^14*b^6 - 65536*(6*u^9 + 4*u^8 - 9*u^7 - 6*u^6 + u^5)*a^12*b^8 - 262144*(u^8 - u^7 - 4*u^6 - u^5 + u^4)*a^10*b^10 - 65536*(u^7 - 6*u^6 - 9*u^5 + 4*u^4 + 6*u^3)*a^8*b^12 + 131072*(u^5 - 3*u^3 - 2*u^2)*a^6*b^14 - 65536*(u^3 + 2*u^2 + u)*a^4*b^16) -
65536*a^4*b^4*(b^2-u^2*a^2)^2*(-(u^3 + 2*u^2 + u)*b^8 + (-4*u^4-8*u^3-4*u^2)*a^2*b^6 + (-6*u^5-12*u^4-6*u^3)*a^4*b^4 + (-4*u^6-8*u^5-4*u^4)*a^6*b^2 + (-u^7-2*u^6-u^5)*a^8)
)

```

```

expr_4_4.maxima_methods().collectterms(a,b)

```

0

```

#####
#####
# Case (5)
#####
#####

```

```

var('u,a,b,c,x,y,A,C,D')

```

```

poly_fact_5=expand(

```



---

```

(x^2+y^2+ A*x +C)*(x + D)
)

poly_fact_5.maxima_methods().collectterms(x,y)
(u, a, b, c, x, y, A, C, D)
(A + D)*x^2 + x^3 + D*y^2 + x*y^2 + C*D + (A*D + C)*x

# D=d_2y/d_3, A=(d_2x-d_2y)/d_3, and then C=d_1/d_3-A*D= (d_1*d_3-\
d_2y*(d_2x-d_2y))/d_3^2.
# This yields C*D=(d_1*d_3-d_2y*(d_2x-d_2y))*d_2y/d_3^3, but we also\
have C*D=d_0/d_3.
# Hence, (d_1*d_3-d_2y*(d_2x-d_2y))*d_2y - d_0*d_3^2 =0. See the \
left hand side below: it is clearly negative, a contradiction.

var('a,b,c,u')
expr=expand(
(d_1*d_3-d_2y*(d_2x-d_2y))*d_2y - d_0*d_3^2
)

expr.maxima_methods().collectterms(a,b,c)
(a, b, c, u)
-64*(u^4 + 2*u^3 + u^2)*a^4*b^4*c^4

#####
#####
# Case (6)
#####
#####

var('u, a, b, c, x, y, A, B')

poly_fact_6=expand(
(x^2+i*x*y+ A*x + B*y +B*(B-i*A))*(x -i*y + (A + i*B))
)

poly_fact_6.maxima_methods().collectterms(x,y)
(u, a, b, c, x, y, A, B)
-I*A^2*B + 2*A*B^2 + I*B^3 + (2*A + I*B)*x^2 + x^3 - I*B*y^2 + x*y^2 + (A^2 + B^2)*x

# x^3 + x*y^2 + (2*A + I*B)*x^2 + (-I*B)*y^2 + (A^2 + B^2)*x + (- I*\
A^2*B + 2*A*B^2 + I*B^3)
#
# d_2x/d_3 = (2*A + I*B)
# d_2y/d_3 = (-I*B)
# d_1/d_3 = (A^2 + B^2)

```

---

```

# d_0/d_3      = (- I*A^2*B + 2*A*B^2 + I*B^3)
#
# A = (d_2x + d_2y)/(2*d_3)
# B = I*d_{2,y}/d_3
#
# We can substitute these into the remaining two equations.
#
# d_1/d_3 = (d_2x + d_2y)^2/(4*d_3^2) - d_2y^2/d_3^2, thus d_1/d_3 = \
      (d_2x^2 + 2*d_2x*d_2y - 3*d_2y^2)/(4*d_3^2), which simplifies to \
      d_2x^2 + 2*d_2x*d_2y - 3*d_2y^2 - 4*d_1*d_3 = 0
#
# d_0/d_3 = (d_2x + d_2y)^2*d_2y/(4*d_3^3) - (d_2x + d_2y)*d_2y^2/\
      d_3^3 + d_2y^3/d_3^3, thus we obtain
# 4*d_0*d_3^2 - (d_2x + d_2y)^2*d_2y + 4*(d_2x + d_2y)*d_2y^2 - 4*\
      d_2y^3 = 0

expr_6_1=expand(
d_2x^2 + 2*d_2x*d_2y - 3*d_2y^2 - 4*d_1*d_3
)

expr_6_2=expand(
4*d_0*d_3^2 - (d_2x + d_2y)^2*d_2y + 4*(d_2x + d_2y)*d_2y^2 - 4*d_2y\
^3
)

# We verify below that if c=a+b, then expr_6_2-4*a*b*(u^2*a^2+(u\
^2+1)*a*b+b^2)*expr_6_1 = 256*u^2*(u + 1)^2*a^4*b^4*(a+b)^4. This\
is a contradiction.

expr_6_3=expand(
(expr_6_2-4*a*b*(u^2*a^2+(u^2+1)*a*b+b^2)*expr_6_1) -
256*u^2*(u + 1)^2*a^4*b^4*(a+b)^4
)
(expr_6_3).maxima_methods().collectterms(c)
32*a^12*u^6 + 64*a^11*b*u^6 - 32*a^10*b^2*u^6 - 128*a^9*b^3*u^6 - 64*a^8*b^4*u^6 -
128*a^8*b^4*u^5 - 256*a^7*b^5*u^5 - 128*a^6*b^6*u^5 - 32*a^10*b^2*u^4 - 64*a^9*b^3*u^4 -
416*a^8*b^4*u^4 - 1280*a^7*b^5*u^4 - 1728*a^6*b^6*u^4 - 1152*a^5*b^7*u^4 - 320*a^4*b^8*u^4
- 640*a^8*b^4*u^3 - 2304*a^7*b^5*u^3 - 3328*a^6*b^6*u^3 - 2304*a^5*b^7*u^3 -
640*a^4*b^8*u^3 - 320*a^8*b^4*u^2 - 1152*a^7*b^5*u^2 - 1728*a^6*b^6*u^2 - 1280*a^5*b^7*u^2
- 416*a^4*b^8*u^2 - 64*a^3*b^9*u^2 - 32*a^2*b^10*u^2 - 128*a^6*b^6*u - 256*a^5*b^7*u -
128*a^4*b^8*u - 64*a^4*b^8 - 128*a^3*b^9 - 32*a^2*b^10 + 64*a*b^11 + 32*b^12 + 64*(a^8*u^6
- 2*a^6*b^2*u^5 - 2*a^6*b^2*u^4 + a^4*b^4*u^4 + 4*a^4*b^4*u^3 + a^4*b^4*u^2 -
2*a^2*b^6*u^2 - 2*a^2*b^6*u + b^8)*c^4 - 32*(3*a^10*u^6 + 4*a^9*b*u^6 - 4*a^8*b^2*u^5 -
8*a^7*b^3*u^5 - 8*a^6*b^4*u^5 - 5*a^8*b^2*u^4 - 8*a^7*b^3*u^4 - 14*a^6*b^4*u^4 -
12*a^5*b^5*u^4 - 8*a^4*b^6*u^4 - 12*a^6*b^4*u^3 - 16*a^5*b^5*u^3 - 12*a^4*b^6*u^3 -
8*a^6*b^4*u^2 - 12*a^5*b^5*u^2 - 14*a^4*b^6*u^2 - 8*a^3*b^7*u^2 - 5*a^2*b^8*u^2 -

```

$$8*a^4*b^6*u - 8*a^3*b^7*u - 4*a^2*b^8*u + 4*a*b^9 + 3*b^{10})*c^2$$

c=a+b

expr\_6\_4=expand(

```

32*a^12*u^6 + 64*a^11*b*u^6 - 32*a^10*b^2*u^6 - 128*a^9*b^3*u^6 - \
64*a^8*b^4*u^6 - 96*a^10*c^2*u^6 - 128*a^9*b*c^2*u^6 + 64*a^8*c\
^4*u^6 - 128*a^8*b^4*u^5 - 256*a^7*b^5*u^5 - 128*a^6*b^6*u^5 + \
128*a^8*b^2*c^2*u^5 + 256*a^7*b^3*c^2*u^5 + 256*a^6*b^4*c^2*u^5 - \
128*a^6*b^2*c^4*u^5 - 32*a^10*b^2*u^4 - 64*a^9*b^3*u^4 - 416*a\
^8*b^4*u^4 - 1280*a^7*b^5*u^4 - 1728*a^6*b^6*u^4 - 1152*a^5*b^7*u\
^4 - 320*a^4*b^8*u^4 + 160*a^8*b^2*c^2*u^4 + 256*a^7*b^3*c^2*u^4 \
+ 448*a^6*b^4*c^2*u^4 + 384*a^5*b^5*c^2*u^4 + 256*a^4*b^6*c^2*u^4\
- 128*a^6*b^2*c^4*u^4 + 64*a^4*b^4*c^4*u^4 - 640*a^8*b^4*u^3 - \
2304*a^7*b^5*u^3 - 3328*a^6*b^6*u^3 - 2304*a^5*b^7*u^3 - 640*a^4*\
b^8*u^3 + 384*a^6*b^4*c^2*u^3 + 512*a^5*b^5*c^2*u^3 + 384*a^4*b\
^6*c^2*u^3 + 256*a^4*b^4*c^4*u^3 - 320*a^8*b^4*u^2 - 1152*a^7*b\
^5*u^2 - 1728*a^6*b^6*u^2 - 1280*a^5*b^7*u^2 - 416*a^4*b^8*u^2 - \
64*a^3*b^9*u^2 - 32*a^2*b^10*u^2 + 256*a^6*b^4*c^2*u^2 + 384*a^5*\
b^5*c^2*u^2 + 448*a^4*b^6*c^2*u^2 + 256*a^3*b^7*c^2*u^2 + 160*a\
^2*b^8*c^2*u^2 + 64*a^4*b^4*c^4*u^2 - 128*a^2*b^6*c^4*u^2 - 128*a\
^6*b^6*u - 256*a^5*b^7*u - 128*a^4*b^8*u + 256*a^4*b^6*c^2*u + \
256*a^3*b^7*c^2*u + 128*a^2*b^8*c^2*u - 128*a^2*b^6*c^4*u - 64*a\
^4*b^8 - 128*a^3*b^9 - 32*a^2*b^10 + 64*a*b^11 + 32*b^12 - 128*a\
b^9*c^2 - 96*b^10*c^2 + 64*b^8*c^4

```

)

(expr\_6\_4).maxima\_methods().collectterms(a,b)

0

# Finally, we verify below that if  $c=|a-b|$ , then  $\text{expr}_6_2+4*a*b*(u^2*a^2-(u^2+1)*a*b+b^2)*\text{expr}_6_1 = 256*u^2*(u+1)^2*a^4*b^4*(a-b)^4$ . As  $c=\pm(a-b)$  is not zero, this is a contradiction.

var('u,a,b,c,x,y,A,B')

expr\_6\_6=expand(

```

expr_6_2+4*a*b*(u^2*a^2-(u^2+1)*a*b+b^2)*expr_6_1 -
256*u^2*(u+1)^2*a^4*b^4*(a-b)^4

```

)

(expr\_6\_6).maxima\_methods().collectterms(c)

(u, a, b, c, x, y, A, B)

```

32*a^12*u^6 - 64*a^11*b*u^6 - 32*a^10*b^2*u^6 + 128*a^9*b^3*u^6 - 64*a^8*b^4*u^6 -
128*a^8*b^4*u^5 + 256*a^7*b^5*u^5 - 128*a^6*b^6*u^5 - 32*a^10*b^2*u^4 + 64*a^9*b^3*u^4 -

```

```

416*a^8*b^4*u^4 + 1280*a^7*b^5*u^4 - 1728*a^6*b^6*u^4 + 1152*a^5*b^7*u^4 - 320*a^4*b^8*u^4 -
640*a^8*b^4*u^3 + 2304*a^7*b^5*u^3 - 3328*a^6*b^6*u^3 + 2304*a^5*b^7*u^3 -

```

$$\begin{aligned}
& 640*a^4*b^8*u^3 - 320*a^8*b^4*u^2 + 1152*a^7*b^5*u^2 - 1728*a^6*b^6*u^2 + 1280*a^5*b^7*u^2 \\
& - 416*a^4*b^8*u^2 + 64*a^3*b^9*u^2 - 32*a^2*b^10*u^2 - 128*a^6*b^6*u + 256*a^5*b^7*u - \\
& 128*a^4*b^8*u - 64*a^4*b^8 + 128*a^3*b^9 - 32*a^2*b^10 - 64*a*b^11 + 32*b^12 + 64*(a^8*u^6 \\
& - 2*a^6*b^2*u^5 - 2*a^6*b^2*u^4 + a^4*b^4*u^4 + 4*a^4*b^4*u^3 + a^4*b^4*u^2 - \\
& 2*a^2*b^6*u^2 - 2*a^2*b^6*u + b^8)*c^4 - 32*(3*a^10*u^6 - 4*a^9*b*u^6 - 4*a^8*b^2*u^5 + \\
& 8*a^7*b^3*u^5 - 8*a^6*b^4*u^5 - 5*a^8*b^2*u^4 + 8*a^7*b^3*u^4 - 14*a^6*b^4*u^4 + \\
& 12*a^5*b^5*u^4 - 8*a^4*b^6*u^4 - 12*a^6*b^4*u^3 + 16*a^5*b^5*u^3 - 12*a^4*b^6*u^3 - \\
& 8*a^6*b^4*u^2 + 12*a^5*b^5*u^2 - 14*a^4*b^6*u^2 + 8*a^3*b^7*u^2 - 5*a^2*b^8*u^2 - \\
& 8*a^4*b^6*u + 8*a^3*b^7*u - 4*a^2*b^8*u - 4*a*b^9 + 3*b^10)*c^2
\end{aligned}$$

# Note that all powers of c that occur in the above expression have \ even exponent, thus we may put c=a-b for simplicity.

c=a-b

expr\_6\_7=expand(

$$\begin{aligned}
& 32*a^12*u^6 - 64*a^11*b*u^6 - 32*a^10*b^2*u^6 + 128*a^9*b^3*u^6 - \backslash \\
& 64*a^8*b^4*u^6 - 128*a^8*b^4*u^5 + 256*a^7*b^5*u^5 - 128*a^6*b^6*\backslash \\
& u^5 - 32*a^10*b^2*u^4 + 64*a^9*b^3*u^4 - 416*a^8*b^4*u^4 + 1280*a*\backslash \\
& ^7*b^5*u^4 - 1728*a^6*b^6*u^4 + 1152*a^5*b^7*u^4 - 320*a^4*b^8*u*\backslash \\
& ^4 - 640*a^8*b^4*u^3 + 2304*a^7*b^5*u^3 - 3328*a^6*b^6*u^3 + \backslash \\
& 2304*a^5*b^7*u^3 - 640*a^4*b^8*u^3 - 320*a^8*b^4*u^2 + 1152*a^7*b*\backslash \\
& ^5*u^2 - 1728*a^6*b^6*u^2 + 1280*a^5*b^7*u^2 - 416*a^4*b^8*u^2 + \backslash \\
& 64*a^3*b^9*u^2 - 32*a^2*b^10*u^2 - 128*a^6*b^6*u + 256*a^5*b^7*u \backslash \\
& - 128*a^4*b^8*u - 64*a^4*b^8 + 128*a^3*b^9 - 32*a^2*b^10 - 64*a*b*\backslash \\
& ^11 + 32*b^12 + 64*(a^8*u^6 - 2*a^6*b^2*u^5 - 2*a^6*b^2*u^4 + a*\backslash \\
& ^4*b^4*u^4 + 4*a^4*b^4*u^3 + a^4*b^4*u^2 - 2*a^2*b^6*u^2 - 2*a^2*\backslash \\
& b^6*u + b^8)*c^4 - 32*(3*a^10*u^6 - 4*a^9*b*u^6 - 4*a^8*b^2*u^5 + \backslash \\
& 8*a^7*b^3*u^5 - 8*a^6*b^4*u^5 - 5*a^8*b^2*u^4 + 8*a^7*b^3*u^4 - \backslash \\
& 14*a^6*b^4*u^4 + 12*a^5*b^5*u^4 - 8*a^4*b^6*u^4 - 12*a^6*b^4*u^3 \backslash \\
& + 16*a^5*b^5*u^3 - 12*a^4*b^6*u^3 - 8*a^6*b^4*u^2 + 12*a^5*b^5*u*\backslash \\
& ^2 - 14*a^4*b^6*u^2 + 8*a^3*b^7*u^2 - 5*a^2*b^8*u^2 - 8*a^4*b^6*u*\backslash \\
& + 8*a^3*b^7*u - 4*a^2*b^8*u - 4*a*b^9 + 3*b^10)*c^2
\end{aligned}$$

)

(expr\_6\_7).maxima\_methods().collectterms(a,b)

0
